# Supplementary material
Source: PubMed Central journal article supplement (PMC9424809)
Supplement: 436_2022_7631_MOESM1_ESM.pdf [file 436_2022_7631_MOESM1_ESM.pdf]

## Supplementary Material

### Prevalence of free-living amoebas in swimming pools and recreational waters, a systematic review and meta-analysis

Beni Jequicene Mussengue Chaúque<sup>a,b</sup>, Denise Leal dos Santos<sup>a</sup>, Davood Anvari<sup>c</sup> and Marilise Brittes Rott<sup>a\*</sup>

<sup>a</sup> Department of Microbiology, Immunology and Parasitology, Institute of Basic Health Sciences, Universidade Federal do Rio Grande do Sul, Brazil.

<sup>b</sup> Department of Science, Technology, Engineering and Mathematics, Universidade Rovuma, Niassa Branch, Mozambique.

<sup>c</sup> Faculty of Medicine, Iranshahr University of Medical Sciences, Iranshahr, Iran

Beni Jequicene Mussengue Chaúque – [benichauq@gmail.com](mailto:benichauq@gmail.com)

Denise Leal dos Santos – [delealsantos@yahoo.com.br](mailto:delealsantos@yahoo.com.br)

Davood Anvari – [davood\\_anvari@live.com](mailto:davood_anvari@live.com)

#### Corresponding author

Marilise Brittes Rott - [marilise.rott@ufrgs.br](mailto:marilise.rott@ufrgs.br)

**Table S1** Percentage of positive samples for each free-living amoebae genus

| References             | Country | Sample source (total)                    | Analyzed samples | Positive samples | Method                                     | Identity                                                                                                | Positive samples |
|------------------------|---------|------------------------------------------|------------------|------------------|--------------------------------------------|---------------------------------------------------------------------------------------------------------|------------------|
| Scaglia et al. 1983    | Italy   | Thermal swimming pools and mud basin spa | 30               | 7                | Morphology, fluorescent-antibody technique | <i>Naegleria australiensis</i>                                                                          | 7                |
| Scaglia et al. 1987    | Italy   | Thermal baths and mud-basins (34)        | 51               | 34               | Morphology and pathogenicity test          | <i>Naegleria</i> spp.                                                                                   | 7                |
| Scaglia et al. 1987    | Italy   | Thermal baths and mud-basins (34)        | 51               | 34               | Morphology and pathogenicity test          | <i>Acanthamoeba</i> spp.                                                                                | 6                |
| Scaglia et al. 1987    | Italy   | Thermal baths and mud-basins (34)        | 51               | 34               | Morphology and pathogenicity test          | <i>Vahlkampfia</i> spp.                                                                                 | 39               |
| Scaglia et al. 1987    | Italy   | Thermal baths and mud-basins (34)        | 51               | 34               | Morphology and pathogenicity test          | <i>Hartmannella</i> spp                                                                                 | 28               |
| Hamadto et al. 1993    | Egypt   | Swimming pool (16)                       | 16               | 12               | Morphology and pathogenicity               | <i>Naegleria</i> spp.                                                                                   | 12               |
| Hamadto et al. 1993    | Egypt   | Swimming pool (16)                       | 16               | 4                | Morphology and pathogenicity               | <i>Acanthamoeba</i> spp.                                                                                | 4                |
| Penas-Ares et al. 1994 | Spain   | Thermal spa water (12)                   | 12               | 8                | Morphology                                 | <i>Vahlkampfia longicauda</i>                                                                           | 1                |
| Penas-Ares et al. 1994 | Spain   | Thermal spa water (12)                   | 12               | 8                | Morphology                                 | <i>Vahlkampfia salina</i>                                                                               | 1                |
| Penas-Ares et al. 1994 | Spain   | Thermal spa water (12)                   | 12               | 8                | Morphology                                 | <i>Vahlkampia baltica</i>                                                                               | 1                |
| Penas-Ares et al. 1994 | Spain   | Thermal spa water (12)                   | 12               | 8                | Morphology                                 | <i>Vahlkampfia</i> sp.                                                                                  | 2                |
| Penas-Ares et al. 1994 | Spain   | Thermal spa water (12)                   | 12               | 8                | Morphology                                 | <i>Acanthamoeba polyphaga</i>                                                                           | 2                |
| Penas-Ares et al. 1994 | Spain   | Thermal spa water (12)                   | 12               | 8                | Morphology                                 | <i>Acanthamoeba lenticulata</i>                                                                         | 1                |
| Penas-Ares et al. 1994 | Spain   | Thermal spa water (12)                   | 12               | 8                | Morphology                                 | <i>Naegleria</i> spp.                                                                                   | 2                |
| Penas-Ares et al. 1994 | Spain   | Thermal spa water (12)                   | 12               | 8                | Morphology                                 | <i>Lingulamoeba</i> spp.                                                                                | 1                |
| Penas-Ares et al. 1994 | Spain   | Thermal spa water (12)                   | 12               | 8                | Morphology                                 | <i>Flabellula</i> spp.                                                                                  | 1                |
| Penas-Ares et al. 1994 | Spain   | Thermal spa water (12)                   | 12               | 8                | Morphology                                 | <i>Paramoeba aesturina</i>                                                                              | 1                |
| Izumiyama et al. 2003  | Japan   | Whirlpool baths and hot spring spa (251) | 549              | 197              | Morphology and PCR                         | <i>Naegleria fowleri</i> , <i>Naegleria lovaniensis</i> and <i>Naegleria australiensis</i>              |                  |
| Munoz et al. 2003      | Chile   | Swimming pool                            | 8                | 5                | Morphology and PCR                         | <i>Hartmanella vermiformes</i> , <i>Vanella</i> spp, <i>Naegleria</i> spp. and <i>Acanthamoeba</i> spp. |                  |
| Sheehan et al. 2003    | USA     | Hot Springs (22)                         | 22               | 12               | Morphology and PCR                         | <i>Naegleria australiensis</i>                                                                          | 5                |
| Sheehan et al. 2003    | USA     | Hot Springs (22)                         | 22               | 12               | Morphology and PCR                         | <i>Naegleria dobsoni</i>                                                                                | 2                |
| Sheehan et al. 2003    | USA     | Hot Springs (22)                         | 22               | 12               | Morphology and PCR                         | <i>Naegleria americana</i>                                                                              | 2                |
| Sheehan et al. 2003    | USA     | Hot Springs (22)                         | 22               | 12               | Morphology and PCR                         | <i>Naegleria pagei</i>                                                                                  | 1                |
| Sheehan et al. 2003    | USA     | Hot Springs (22)                         | 22               | 12               | Morphology and PCR                         | <i>Naegleria polaris</i>                                                                                | 1                |
| Sheehan et al. 2003    | USA     | Hot Springs (22)                         | 22               | 12               | Morphology and PCR                         | <i>Naegleria fultoni</i>                                                                                | 1                |

|                        |             |                                                 |     |    |                    |                                                       |    |
|------------------------|-------------|-------------------------------------------------|-----|----|--------------------|-------------------------------------------------------|----|
| 2003                   |             |                                                 |     |    | PCR                |                                                       |    |
| Tsvetkova et al. 2004  | Bulgaria    | Outdoor swimming pools (6)                      | 7   | 6  | Morphology and PCR | <i>Acanthamoeba</i> spp. and <i>Hartmannella</i> spp. |    |
| Tsvetkova et al. 2004  | Bulgaria    | Indoor swimming pools (19)                      | 24  | 9  | Morphology and PCR | <i>Acanthamoeba</i> spp. and <i>Hartmannella</i> spp. |    |
| Sukthana et al. 2005   | Thailand    | Hot spring                                      | 57  | 15 | Morphology         | <i>Naegleria</i> spp.                                 | 15 |
| Sukthana et al. 2005   | Thailand    | Hot spring                                      | 57  | 9  | Morphology         | <i>Acanthamoeba</i> spp.                              | 9  |
| Rezaeian et al. 2008   | Iran        | Swimming pool                                   | 2   | 2  | Morphology         | <i>Acanthamoeba</i> spp.                              | 2  |
| Caumo et al. 2009      | Brazil      | Swimming pools                                  | 65  | 13 | Morphology and PCR | <i>Acanthamoeba</i> spp.                              | 13 |
| Gianinazzi et al. 2009 | Switzerland | Indoor hot swimming pools                       | 1   | 1  | Morphology and PCR | <i>Acanthamoeba lenticulata</i>                       | 1  |
| Hsu et al. 2009        | Taiwan      | Recreational hot springs                        | 55  | 9  | PCR                | <i>Acanthamoeba griffin</i>                           | 7  |
| Hsu et al. 2009        | Taiwan      | Recreational hot springs                        | 55  | 9  | PCR                | <i>Acanthamoeba jacobsi</i>                           | 2  |
| Hsu et al. 2009a       | Taiwan      | Mud recreation area water                       | 34  | 20 | Morphology and PCR | <i>Acanthamoeba</i> spp.                              | 3  |
| Hsu et al. 2009a       | Taiwan      | Mud recreation area water                       | 34  | 20 | Morphology and PCR | <i>Hartmannella</i> spp.                              | 12 |
| Hsu et al. 2009a       | Taiwan      | Mud recreation area water                       | 34  | 20 | Morphology and PCR | <i>Naegleria</i> spp.                                 | 5  |
| Gianinazzi et al. 2010 | Sweden      | Hot springs (4)                                 | 31  | 9  | Morphology and PCR | <i>Acanthamoeba healyi</i>                            | 5  |
| Gianinazzi et al. 2010 | Sweden      | Hot springs (4)                                 | 31  | 9  | Morphology and PCR | <i>Stenoamoeba</i> sp.                                | 1  |
| Gianinazzi et al. 2010 | Sweden      | Hot springs (4)                                 | 31  | 9  | Morphology and PCR | <i>Hartmannella vermiformis</i>                       | 1  |
| Gianinazzi et al. 2010 | Sweden      | Hot springs (4)                                 | 31  | 9  | Morphology and PCR | <i>Echinamoeba exundans</i>                           | 2  |
| Huang and Hsu 2010     | Taiwan      | Hot springs and waste water in recreation areas | 52  | 11 | PCR                | <i>Acanthamoeba</i> T1                                | 1  |
| Huang and Hsu 2010     | Taiwan      | Hot springs and waste water in recreation areas | 52  | 11 | PCR                | <i>Acanthamoeba</i> T2                                | 1  |
| Huang and Hsu 2010     | Taiwan      | Hot springs and waste water in recreation areas | 52  | 11 | PCR                | <i>Acanthamoeba</i> T3                                | 1  |
| Huang and Hsu 2010     | Taiwan      | Hot springs and waste water in recreation areas | 52  | 11 | PCR                | <i>Acanthamoeba</i> T4                                | 1  |
| Huang and Hsu 2010     | Taiwan      | Hot springs and waste water in recreation areas | 52  | 11 | PCR                | <i>Acanthamoeba</i> T5                                | 2  |
| Huang and Hsu, 2010    | Taiwan      | Hot springs and waste water in recreation areas | 52  | 11 | PCR                | <i>Acanthamoeba</i> T6                                | 3  |
| Huang and Hsu, 2010    | Taiwan      | Hot springs and waste water in recreation areas | 52  | 11 | PCR                | <i>Acanthamoeba</i> T15                               | 4  |
| Huang and Hsu, 2010a   | Taiwan      | Hot springs and hot spring facilities           | 106 | 15 | Morphology and PCR | <i>Naegleria lovaniensis</i>                          | 6  |
| Huang and Hsu, 2010a   | Taiwan      | Hot springs and hot spring facilities           | 106 | 15 | Morphology and PCR | <i>Naegleria australiensis</i>                        | 5  |
| Huang and Hsu, 2010a   | Taiwan      | Hot springs and hot spring facilities           | 106 | 15 | Morphology and PCR | <i>Naegleria clarki</i>                               | 2  |
| Huang and Hsu, 2010a   | Taiwan      | Hot springs and hot spring facilities           | 106 | 15 | Morphology and PCR | <i>Naegleria americana</i>                            | 1  |
| Huang and Hsu, 2010a   | Taiwan      | Hot springs and hot spring facilities           | 106 | 15 | Morphology and PCR | <i>Naegleria pagei</i>                                | 1  |

|                         |          |                                           |     |    |                    |                                 |    |
|-------------------------|----------|-------------------------------------------|-----|----|--------------------|---------------------------------|----|
| Lares-Villa et al. 2010 | Mexico   | Natural Recreational water (2)            | 24  | 24 | PCR                | Thermophilic amoebae            | 24 |
| Lares-Villa et al. 2010 | Mexico   | Natural Recreational water (2)            | 24  | 24 | PCR                | <i>Naegleria</i> spp.           | 14 |
| Lares-Villa et al. 2010 | Mexico   | Natural Recreational water (2)            | 24  | 24 | PCR                | <i>Naegleria fowleri</i>        | 6  |
| Badirzadeh et al. 2011  | Iran     | Recreational hot springs                  | 28  | 12 | Morphology and PCR | <i>Vahlkampfiia</i> spp.        | 11 |
| Huang and Hsu, 2011     | Taiwan   | Recreational waters                       | 107 | 19 | PCR                | <i>Naegleria</i> spp.           | 19 |
| Ithoi et al. 2011       | Malaysia | Recreational pools, lakes and streams     | 33  | 33 | Morphology and PCR | <i>Naegleria</i> spp.           | 33 |
| Nazar et al. 2011       | Iran     | Water in recreation areas                 | 50  | 16 | Morphology and PCR | <i>Acanthamoeba</i> T4          | 14 |
| Nazar et al. 2011       | Iran     | Water in recreation areas                 | 50  | 16 | Morphology and PCR | <i>Acanthamoeba</i> T5          | 2  |
| Alves et al. 2012       | Brazil   | Public swimming pools (7)                 | 7   | 7  | Morphology and PCR | <i>Acanthamoeba</i> spp.        | 7  |
| Kao et al. 2012         | Taiwan   | Recreation and drinking water sources (2) | 211 | 13 | PCR                | <i>Naegleria philippinensis</i> | 3  |
| Kao et al. 2012         | Taiwan   | Recreation and drinking water sources (2) | 211 | 13 | PCR                | <i>Naegleria clarki</i>         | 2  |
| Kao et al. 2012         | Taiwan   | Recreation and drinking water sources (2) | 211 | 13 | PCR                | <i>Naegleria galica</i>         | 2  |
| Kao et al. 2012         | Taiwan   | Recreation and drinking water sources (2) | 211 | 13 | PCR                | <i>Naegleria americana</i>      | 2  |
| Kao et al. 2012         | Taiwan   | Recreation and drinking water sources (2) | 211 | 13 | PCR                | <i>Naegleria australiensis</i>  | 1  |
| Kao et al. 2012         | Taiwan   | Recreation and drinking water sources (2) | 211 | 13 | PCR                | <i>Naegleria dobsoni</i>        | 1  |
| Kao et al. 2012         | Taiwan   | Recreation and drinking water sources (2) | 211 | 13 | PCR                | <i>Naegleria gruberi</i>        | 1  |
| Kao et al. 2012         | Taiwan   | Recreation and drinking water sources (2) | 211 | 13 | PCR                | <i>Naegleria schusteri</i>      | 1  |
| Kao et al. 2012a        | Taiwan   | Recreational hot springs (4)              | 60  | 9  | Morphology and PCR | <i>Acanthamoeba</i> T15         | 4  |
| Kao et al. 2012a        | Taiwan   | Recreational hot springs (4)              | 60  | 9  | Morphology and PCR | <i>Acanthamoeba</i> T4          | 3  |
| Kao et al. 2012a        | Taiwan   | Recreational hot springs (4)              | 60  | 9  | Morphology and PCR | <i>Acanthamoeba</i> T2          | 1  |
| Kao et al. 2012a        | Taiwan   | Recreational hot springs (4)              | 60  | 9  | Morphology and PCR | <i>Acanthamoeba</i> spp.        | 1  |
| Kao et al. 2012b        | Taiwan   | Hot springs                               | 60  | 26 | Morphology and PCR | <i>Naegleria australiensis</i>  | 20 |
| Kao et al. 2012b        | Taiwan   | Hot springs                               | 60  | 26 | Morphology and PCR | <i>Naegleria lovaniensis</i>    | 4  |
| Kao et al. 2012b        | Taiwan   | Hot springs                               | 60  | 26 | Morphology and PCR | <i>Naegleria mexicana</i>       | 1  |
| Kao et al. 2012b        | Taiwan   | Hot springs                               | 60  | 26 | Morphology and PCR | <i>Naegleria gruberi</i>        | 1  |
| Nazar et al. 2012       | Iran     | Recreational waters (22)                  | 50  | 8  | Morphology and PCR | <i>Hartmannella vermiformis</i> | 6  |
| Nazar et al. 2012       | Iran     | Recreational waters (22)                  | 50  | 8  | Morphology and PCR | <i>Vannella persistens</i>      | 2  |
| Niyyati et al. 2012     | Iran     | River recreation areas (10)               | 55  | 15 | Morphology and PCR | <i>Acanthamoeba</i> T4          | 12 |
| Niyyati et al. 2012     | Iran     | River recreation areas (10)               | 55  | 15 | Morphology and PCR | <i>Naegleria pagei</i>          | 1  |
| Niyyati et al. 2012     | Iran     | River recreation areas                    | 55  | 15 | Morphology and PCR | <i>Naegleria fultoni</i>        | 1  |

|                         |             |                                                      |     |    |                    |                                 |    |
|-------------------------|-------------|------------------------------------------------------|-----|----|--------------------|---------------------------------|----|
|                         |             | (10)                                                 |     |    | PCR                |                                 |    |
| Niyyati et al. 2012     | Iran        | River recreation areas (10)                          | 55  | 15 | Morphology and PCR | <i>Naegleria clarki</i>         | 1  |
| Rahdar et al. 2012      | Iran        | Swimming pool (4)                                    | 4   | 2  | Morphology and PCR | <i>Acanthamoeba</i> T4          | 2  |
| Solgi et al. 2012       | Iran        | Hot springs                                          | 30  | 8  | Morphology and PCR | <i>Hartmannella vermiformis</i> | 5  |
| Solgi et al. 2012       | Iran        | Hot springs                                          | 30  | 8  | Morphology and PCR | <i>Naegleria carteri</i>        | 1  |
| Solgi et al. 2012       | Iran        | Hot springs                                          | 30  | 8  | Morphology and PCR | <i>Naegleria</i> spp            | 2  |
| Solgi et al. 2012a      | Iran        | Therapeutic hot springs                              | 60  | 12 | Morphology and PCR | <i>Acanthamoeba</i> T4          | 2  |
| Solgi et al. 2012a      | Iran        | Therapeutic hot springs                              | 60  | 12 | Morphology and PCR | <i>Acanthamoeba</i> T3          | 10 |
| Kao et al. 2013         | China       | Thermal spring water                                 | 48  | 4  | PCR                | <i>Naegleria</i> spp.           | 4  |
| Moussa et al. 2013      | France      | Recreational geothermal waters (6)                   | 73  | 35 | PCR                | <i>Naegleria fowleri</i>        | 28 |
| Moussa et al. 2013      | France      | Recreational geothermal waters (6)                   | 73  | 35 | PCR                | <i>Naegleria lovaniensis</i>    | 7  |
| Tung et al. 2013        | Taiwan      | Hot spring (1)                                       | 25  | 13 | Morphology and PCR | <i>Naegleria australiensis</i>  | 6  |
| Tung et al. 2013        | Taiwan      | Hot spring (1)                                       | 25  | 13 | Morphology and PCR | <i>Naegleria lovaniensis</i>    | 1  |
| Tung et al. 2013        | Taiwan      | Hot spring (1)                                       | 25  | 13 | Morphology and PCR | <i>Naegleria fowleri</i>        | 1  |
| Tung et al. 2013        | Taiwan      | Hot spring (1)                                       | 25  | 13 | Morphology and PCR | <i>Acanthamoeba jacobsi</i>     | 5  |
| Al-Herrawy et al. 2014  | Egypt       | Swimming pools (10)                                  | 120 | 59 | Morphology and PCR | <i>Acanthamoeba</i> spp.        | 59 |
| Ji et al. 2014          | Taiwan      | Hot springs                                          | 61  | 29 | Morphology and PCR | <i>Acanthamoeba</i> spp.        | 29 |
| Ji et al. 2014          | Taiwan      | Hot springs                                          | 61  | 17 | Morphology and PCR | <i>Naegleria</i> spp.           | 17 |
| Ji et al. 2014          | Taiwan      | Hot springs                                          | 61  | 11 | Morphology and PCR | <i>Vermamoeba vermiformis</i>   | 11 |
| Kao et al. 2013a        | China       | Thermal spring                                       | 48  | 5  | PCR                | <i>Acanthamoeba</i> spp.        | 5  |
| Kiss et al. 2014        | Hungary     | Swimming pools (20)                                  | 164 | 68 | Morphology and PCR | <i>Acanthamoeba</i> spp.        | 68 |
| Onichandran et al. 2014 | Philippines | Recreational rivers (4)                              | 10  | 4  | Morphology and PCR | <i>Acanthamoeba</i> spp.        | 3  |
| Onichandran et al. 2014 | Philippines | Recreational rivers (4)                              | 10  | 4  | Morphology and PCR | <i>Naegleria</i> spp.           | 1  |
| Onichandran et al. 2014 | Philippines | Swimming pool (3)                                    | 3   | 2  | Morphology and PCR | <i>Acanthamoeba</i> spp.        | 2  |
| Onichandran et al. 2014 | Philippines | Recreational pond (2)                                | 4   | 2  | Morphology and PCR | <i>Acanthamoeba</i> spp.        | 2  |
| Onichandran et al. 2014 | Philippines | Recreational natural lakes                           | 6   | 4  | Morphology and PCR | <i>Acanthamoeba</i> spp.        | 2  |
| Onichandran et al. 2014 | Philippines | Recreational natural lakes                           | 6   | 4  | Morphology and PCR | <i>Naegleria</i> spp.           | 2  |
| Sifuentes et al. 2014   | USA         | Recreational water (33)                              | 103 | 18 | PCR                | Thermophilic amoebas            | 20 |
| Sifuentes et al. 2014   | USA         | Recreational water (33)                              | 103 | 18 | PCR                | <i>Naegleria fowleri</i>        | 14 |
| Behniafar et al. 2015   | Iran        | Recreational water (Cold and hot springs, and river) | 40  | 7  | Morphology and PCR | <i>Acanthamoeba</i> spp.        | 7  |
| Evyapan et al. 2015     | Turkey      | Swimming pools and hot springs                       | 50  | 21 | Morphology and PCR | <i>Acanthamoeba griffini</i>    | 1  |

|                        |          |                                                       |     |    |                    |                                 |    |
|------------------------|----------|-------------------------------------------------------|-----|----|--------------------|---------------------------------|----|
| Evyapan et al. 2015    | Turkey   | Swimming pools and hot springs                        | 50  | 21 | Morphology and PCR | <i>Acanthamoeba castellanii</i> | 19 |
| Evyapan et al. 2015    | Turkey   | Swimming pools and hot springs                        | 50  | 21 | Morphology and PCR | <i>Acanthamoeba jacobsi</i>     | 1  |
| Niyyati et al. 2015    | Iran     | Recreational water (lakes, pools and streams)         | 60  | 9  | Morphology and PCR | <i>Naegleria australiensis</i>  | 7  |
| Niyyati et al. 2015    | Iran     | Recreational water (lakes, pools and streams)         | 60  | 9  | Morphology and PCR | <i>Naegleria pagei</i>          | 2  |
| Niyyati et al. 2015a   | Iran     | Recreational waters                                   | 50  | 15 | Morphology and PCR | <i>Acanthamoeba castellanii</i> | 15 |
| Todd et al. 2015       | Jamaica  | Recreational waters                                   | 83  | 42 | Morphology and PCR | <i>Acanthamoeba</i> T4          | 20 |
| Todd et al. 2015       | Jamaica  | Recreational waters                                   | 83  | 42 | Morphology and PCR | <i>Acanthamoeba</i> T5          | 4  |
| Todd et al. 2015       | Jamaica  | Recreational waters                                   | 83  | 42 | Morphology and PCR | <i>Acanthamoeba</i> T10         | 1  |
| Todd et al. 2015       | Jamaica  | Recreational waters                                   | 83  | 42 | Morphology and PCR | <i>Acanthamoeba</i> T11         | 2  |
| Al-Herrawy et al. 2016 | Egypt    | Swimming pools (1)                                    | 48  | 30 | Morphology and PCR | <i>Acanthamoeba</i> spp.        | 29 |
| Al-Herrawy et al. 2016 | Egypt    | Swimming pools (1)                                    | 48  | 30 | Morphology and PCR | <i>Naegleria</i> spp.           | 7  |
| Al-Herrawy et al. 2016 | Egypt    | Swimming pools (1)                                    | 48  | 30 | Morphology and PCR | <i>Hartmannella</i> spp.        | 8  |
| Armand et al. 2016     | Iran     | Swimming pool                                         | 17  | 12 | Morphology and PCR | <i>Vermamoeba</i> spp.          | 10 |
| Armand et al. 2016     | Iran     | Swimming pool                                         | 17  | 12 | Morphology and PCR | <i>Acanthamoeba</i> T4          | 5  |
| Armand et al. 2016     | Iran     | Swimming pool                                         | 17  | 12 | Morphology and PCR | <i>Acanthamoeba lenticulata</i> | 2  |
| Azlan et al. 2016      | Malaysia | Recreational lake                                     | 7   | 7  | Morphology         | <i>Acanthamoeba</i> spp.        | 7  |
| Fabres et al. 2016     | Brazil   | Hot tubs and thermal pools                            | 72  | 20 | Morphology and PCR | <i>Acanthamoeba</i> T3          | 1  |
| Fabres et al. 2016     | Brazil   | Hot tubs and thermal pools                            | 72  | 20 | Morphology and PCR | <i>Acanthamoeba</i> T4          | 2  |
| Fabres et al. 2016     | Brazil   | Hot tubs and thermal pools                            | 72  | 20 | Morphology and PCR | <i>Acanthamoeba</i> T5          | 1  |
| Fabres et al. 2016     | Brazil   | Hot tubs and thermal pools                            | 72  | 20 | Morphology and PCR | <i>Acanthamoeba</i> T15         | 4  |
| Latifi et al. 2016     | Iran     | Hot springs                                           | 66  | 2  | Morphology and PCR | <i>Balamuthia mandrillaris</i>  | 2  |
| Niyyati et al. 2016    | Iran     | Recreational and therapeutic geothermal water sources | 40  | 20 | PCR                | <i>Acanthamoeba</i> T2          | 1  |
| Niyyati et al. 2016    | Iran     | Recreational and therapeutic geothermal water sources | 40  | 20 | PCR                | <i>Acanthamoeba</i> T4          | 19 |
| Al-Herrawy et al. 2017 | Egypt    | Swimming pool (2)                                     | 144 | 37 | Morphology and PCR | <i>Acanthamoeba</i> spp.        | 32 |
| Al-Herrawy et al. 2017 | Egypt    | Swimming pool (2)                                     | 144 | 37 | Morphology and PCR | <i>Naegleria</i> spp.           | 10 |
| Di Filippo et al. 2017 | Italy    | Geothermal springs                                    | 36  | 26 | Morphology and PCR | <i>Naegleria australiensis</i>  | 18 |
| Di Filippo et al. 2017 | Italy    | Geothermal springs                                    | 36  | 26 | Morphology and PCR | <i>Naegleria itálica</i>        | 2  |
| Di Filippo et al. 2017 | Italy    | Geothermal springs                                    | 36  | 26 | Morphology and PCR | <i>Naegleria lovaniensis</i>    | 5  |
| Di Filippo et al. 2017 | Italy    | Geothermal springs                                    | 36  | 26 | Morphology and PCR | <i>Naegleria</i> spp.           | 1  |

|                           |              |                                               |     |    |                    |                                 |    |
|---------------------------|--------------|-----------------------------------------------|-----|----|--------------------|---------------------------------|----|
| Javanmard et al. 2017     | Iran         | Public swimming, natural pool and hot springs | 33  | 6  | Morphology and PCR | <i>Naegleria pagei</i>          | 1  |
| Javanmard et al. 2017     | Iran         | Public swimming, natural pool and hot springs | 33  | 6  | Morphology and PCR | <i>Vermamoeba vermiformis</i>   | 3  |
| Javanmard et al. 2017     | Iran         | Public swimming, natural pool and hot springs | 33  | 6  | Morphology and PCR | <i>Naegleria gruberi</i>        | 2  |
| Latifi et al. 2017        | Iran         | Recreation hot springs                        | 22  | 12 | Morphology and PCR | <i>Naegleria australiensis</i>  | 5  |
| Latifi et al. 2017        | Iran         | Recreation hot springs                        | 22  | 12 | Morphology and PCR | <i>Naegleria americana</i>      | 2  |
| Latifi et al. 2017        | Iran         | Recreation hot springs                        | 22  | 12 | Morphology and PCR | <i>Naegleria dobsoni</i>        | 2  |
| Latifi et al. 2017        | Iran         | Recreation hot springs                        | 22  | 12 | Morphology and PCR | <i>Naegleria pagei</i>          | 1  |
| Latifi et al. 2017        | Iran         | Recreation hot springs                        | 22  | 12 | Morphology and PCR | <i>Naegleria polaris</i>        | 1  |
| Latifi et al. 2017        | Iran         | Recreation hot springs                        | 22  | 12 | Morphology and PCR | <i>Naegleria fultoni</i>        | 1  |
| Reyes-Batlle et al. 2017  | Spain        | Recreational waters (10)                      | 10  | 1  | Morphology and PCR | <i>Naegleria</i> spp.           | 1  |
| Toula and Elahl 2017      | Saudi Arabia | Swimming pool (6)                             | 16  | 6  | Morphology         | <i>Acanthamoeba</i> spp.        | 4  |
| Toula and Elahl 2017      | Saudi Arabia | Swimming pool (6)                             | 16  | 6  | Morphology         | <i>Naegleria</i> spp.           | 2  |
| Dodangeh et al. 2018      | Iran         | Recreational hot springs                      | 24  | 11 | Morphology and PCR | <i>Acanthamoeba castellanii</i> | 11 |
| Ghaderifar et al. 2018    | Iran         | Parks pond water (13)                         | 90  | 31 | Morphology and PCR | <i>Acanthamoeba</i> T4          | 31 |
| Hikal et al. 2018         | Egypt        | Swimming pool (5)                             | 100 | 79 | Morphology and PCR | <i>Naegleria</i> spp.           | 56 |
| Hikal et al. 2018         | Egypt        | Swimming pool (5)                             | 100 | 24 | Morphology and PCR | <i>Naegleria fowleri</i>        | 24 |
| Lares-Jiménez et al. 2018 | Mexico       | Hot springs (1)                               | 8   | 8  | Morphology and PCR | <i>Naegleria lovaniensis</i>    | 7  |
| Lares-Jiménez et al. 2018 | Mexico       | Hot springs (1)                               | 8   | 8  | Morphology and PCR | <i>Acanthamoeba jacobsi</i>     | 3  |
| Lares-Jiménez et al. 2018 | Mexico       | Hot springs (1)                               | 8   | 8  | Morphology and PCR | <i>Stenamoeba</i> spp.          | 2  |
| Lares-Jiménez et al. 2018 | Mexico       | Hot springs (1)                               | 8   | 8  | Morphology and PCR | <i>Vermamoeba vermiformis</i>   | 1  |
| Poor et al. 2018          | Iran         | Swimming pools and hot tubs (10)              | 40  | 8  | Morphology and PCR | <i>Acanthamoeba</i> T3          | 2  |
| Poor et al. 2018          | Iran         | Swimming pools and hot tubs (10)              | 40  | 8  | Morphology and PCR | <i>Acanthamoeba</i> T4          | 6  |
| Xue et al. 2018           | USA          | lake recreation areas (10)                    | 160 | 56 | PCR                | <i>Naegleria fowleri</i>        | 56 |
| Gabriel et al. 2019       | Malaysia     | Recreational places                           | 57  | 40 | Morphology and PCR | <i>Acanthamoeba</i> spp.        | 40 |
| Gabriel et al. 2019       | Malaysia     | Recreational places                           | 57  | 40 | Morphology and PCR | <i>Naegleria</i> spp.           | 38 |
| Haddad et al. 2019        | Iran         | Hot springs                                   | 54  | 15 | Morphology and PCR | <i>Acanthamoeba castellanii</i> | 12 |
| Haddad et al. 2019        | Iran         | Hot springs                                   | 54  | 15 | Morphology and PCR | <i>Vermamoeba vermiformis</i>   | 4  |
| Haddad et al. 2019        | Iran         | Hot springs                                   | 54  | 15 | Morphology and PCR | <i>Naegleria australiensis</i>  | 2  |
| Haddad et al. 2019        | Iran         | Hot springs                                   | 54  | 15 | Morphology and PCR | <i>Naegleria pageii</i>         | 2  |
| Haddad et al. 2019        | Iran         | Hot springs                                   | 54  | 15 | Morphology and PCR | <i>Naegleria gruberi</i>        | 1  |

|                            |             |                                        |     |    |                     |                                  |    |
|----------------------------|-------------|----------------------------------------|-----|----|---------------------|----------------------------------|----|
| Hussain et al. 2019        | Malaysia    | Recreational hot springs (5)           | 50  | 38 | Morphology and PCR  | <i>Acanthamoeba</i> T3           | 2  |
| Hussain et al. 2019        | Malaysia    | Recreational hot springs (5)           | 50  | 38 | Morphology and PCR  | <i>Acanthamoeba</i> T4           | 24 |
| Hussain et al. 2019        | Malaysia    | Recreational hot springs (5)           | 50  | 38 | Morphology and PCR  | <i>Acanthamoeba</i> T5           | 1  |
| Hussain et al. 2019        | Malaysia    | Recreational hot springs (5)           | 50  | 38 | Morphology and PCR  | <i>Acanthamoeba</i> T11          | 1  |
| Hussain et al. 2019        | Malaysia    | Recreational hot springs (5)           | 50  | 38 | Morphology and PCR  | <i>Acanthamoeba</i> T15          | 9  |
| Hussain et al. 2019        | Malaysia    | Recreational hot springs (5)           | 50  | 38 | Morphology and PCR  | <i>Acanthamoeba</i> T17          | 1  |
| Maghsoodloorad et al. 2019 | Iran        | Recreational park water                | 30  | 8  | Morphology and PCR  | <i>Acanthamoeba</i> spp. T4      | 4  |
| Maghsoodloorad et al. 2019 | Iran        | Recreational park water                | 30  | 8  | Morphology and PCR  | <i>Acanthamoeba</i> spp. T15     | 1  |
| Salehi et al. 2019         | Iran        | Park pools and Swimming pool           | 14  | 12 | Morphology and PCR  | <i>Acanthamoeba</i> spp.         | 12 |
| Attariani et al. 2020      | Iran        | Swimming pools                         | 42  | 3  | Morphology and PCR  | <i>Acanthamoeba</i> spp.         | 3  |
| Ballares et al. 2020       | Philippines | Recreational waters (6)                | 16  | 6  | Morphology and PCR  | <i>Acanthamoeba</i> T4           | 2  |
| Ballares et al. 2020       | Philippines | Recreational waters (6)                | 16  | 6  | Morphology and PCR  | <i>Acanthamoeba</i> T5           | 2  |
| Ballares et al. 2020       | Philippines | Recreational waters (6)                | 16  | 6  | Morphology and PCR  | <i>Acanthamoeba</i> T9           | 2  |
| Bonilla-Lemus et al. 2020  | Mexico      | Recreational waters (9)                | 9   | 9  | Morphology and PCR  | <i>Naegleria australiensis</i>   | 3  |
| Bonilla-Lemus et al. 2020  | Mexico      | Recreational waters (9)                | 9   | 9  | Morphology and PCR  | <i>Naegleria gruberi</i>         | 2  |
| Bonilla-Lemus et al. 2020  | Mexico      | Recreational waters (9)                | 9   | 9  | Morphology and PCR  | <i>Naegleria fowleri</i>         | 2  |
| Bonilla-Lemus et al. 2020  | Mexico      | Recreational waters (9)                | 9   | 9  | Morphology and PCR  | <i>Naegleria clarki</i>          | 2  |
| Bonilla-Lemus et al. 2020  | Mexico      | Recreational waters (9)                | 9   | 9  | Morphology and PCR  | <i>Naegleria pagei</i>           | 2  |
| El-Badry et al. 2020       | Egypt       | Swimming pool (7)                      | 28  | 0  | Morphology and PCR  |                                  |    |
| Esboei et al. 2020         | Iran        | Swimming pools                         | 30  | 12 | Morphology and PCR  | <i>Acanthamoeba</i> T4           | 4  |
| Paknejad et al. 2020       | Iran        | Water from swimming pools and bathtubs | 166 | 31 | Morphology and PCR  | <i>Acanthamoeba</i> T3           | 8  |
| Paknejad et al. 2020       | Iran        | Water from swimming pools and bathtubs | 166 | 31 | Morphology and PCR  | <i>Acanthamoeba</i> T4           | 3  |
| Paknejad et al. 2020       | Iran        | Water from swimming pools and bathtubs | 166 | 31 | Morphology and PCR  | <i>Acanthamoeba</i> T11          | 1  |
| Paknejad et al. 2020       | Iran        | Water from swimming pools and bathtubs | 166 | 31 | Morphology and PCR  | <i>Protacanthamoeba bohemica</i> | 6  |
| Paknejad et al. 2020       | Iran        | Water from swimming pools and bathtubs | 166 | 31 | Morphology and PCR  | <i>Naegleria lovaniensis</i>     | 2  |
| Zeybek and Türkmen 2020    | Turkey      | Swimming pool                          | 25  | 7  | Morphology and FISH |                                  |    |
| Aykur and Dagci 2021       | Turkey      | Swimming pools                         | 26  | 3  | PCR                 | <i>Acanthamoeba</i> T2           | 1  |
| Aykur and Dagci 2021       | Turkey      | Swimming pools                         | 26  | 3  | PCR                 | <i>Acanthamoeba</i> T4           | 1  |
| Aykur and Dagci 2021       | Turkey      | Swimming pools                         | 26  | 3  | PCR                 | <i>Acanthamoeba</i> T5           | 1  |
| Bakri et al. 2021          | Saudi       | Swimming pool                          | 10  | 4  | Morphology and      | <i>Acanthamoeba</i> spp.         | 2  |



|                                |              |                                         |    |    |                    |                             |    |
|--------------------------------|--------------|-----------------------------------------|----|----|--------------------|-----------------------------|----|
|                                | Arabia       |                                         |    |    | PCR                |                             |    |
| Bakri et al. 2021              | Saudi Arabia | Swimming pool                           | 10 | 4  | Morphology and PCR | <i>Naegleria</i> spp.       | 2  |
| Eftekhari-Kenzerki et al. 2021 | Iran         | Indoor public swimming pools (20)       | 80 | 32 | Morphology and PCR | <i>Acanthamoeba</i> spp.    | 32 |
| Nageeb et al. 2022             | Egypt        | swimming pool (2)                       | 8  | 0  | Morphology, PCR    |                             |    |
| Rocha et al. 2022              | Brazil       | Swimming pool (9)                       | 36 | 15 | Morphology         | <i>Acanthamoeba</i> spp.    | 7  |
| Rocha et al. 2022              | Brazil       | Swimming pool (9)                       | 36 | 15 | Morphology         | <i>Naegleria</i> spp.       | 11 |
| Salehi et al. 2022             | Iran         | Swimming pools and Park pools           | 20 | 17 | Morphology and PCR | <i>Acanthamoeba</i> spp.    | 17 |
| Sousa-Ramos et al. 2022        | Cape Verde   | Recreational fountain and Swimming pool | 4  | 2  | Morphology and PCR | <i>Acanthamoeba</i> spp. T4 | 1  |
| Sousa-Ramos et al. 2022        | Cape Verde   | Recreational fountain and Swimming pool | 4  | 2  | Morphology and PCR | <i>Vannella</i> spp.        | 1  |

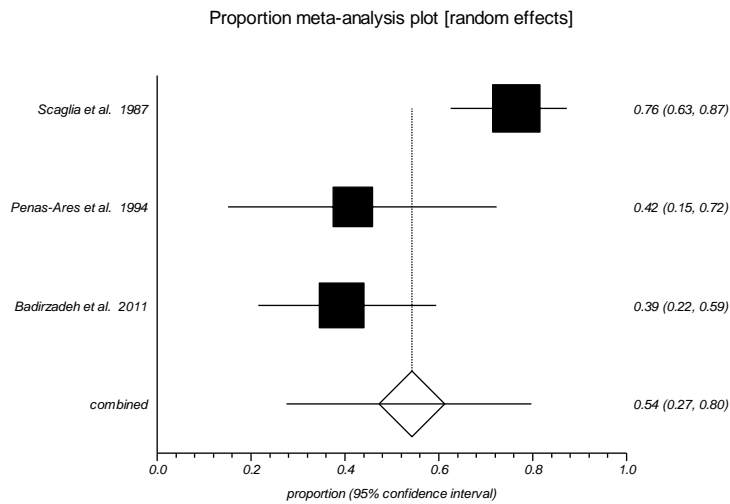

**Fig. S1** Results of Egger's regression test and the forest plot of the worldwide prevalence of *Vahlkampfia* spp.

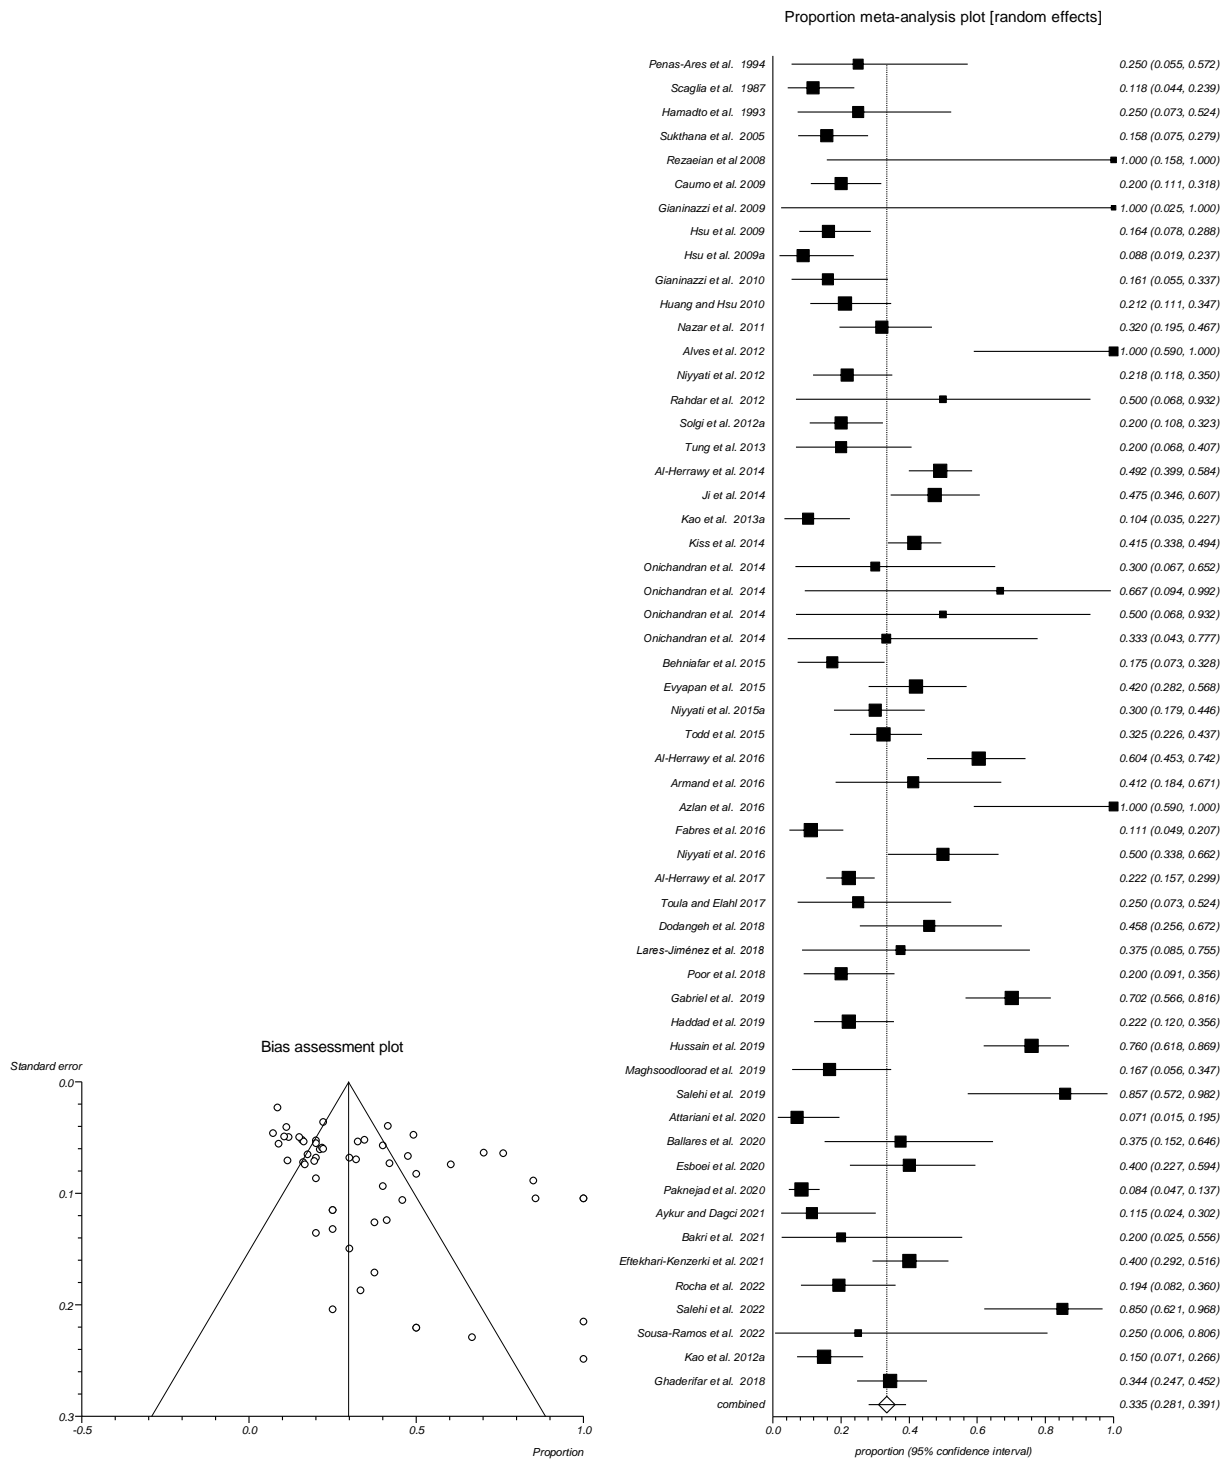

**Fig. S2** Results of Egger's regression test and the forest plot of the worldwide prevalence of *Acanthamoeba* spp.

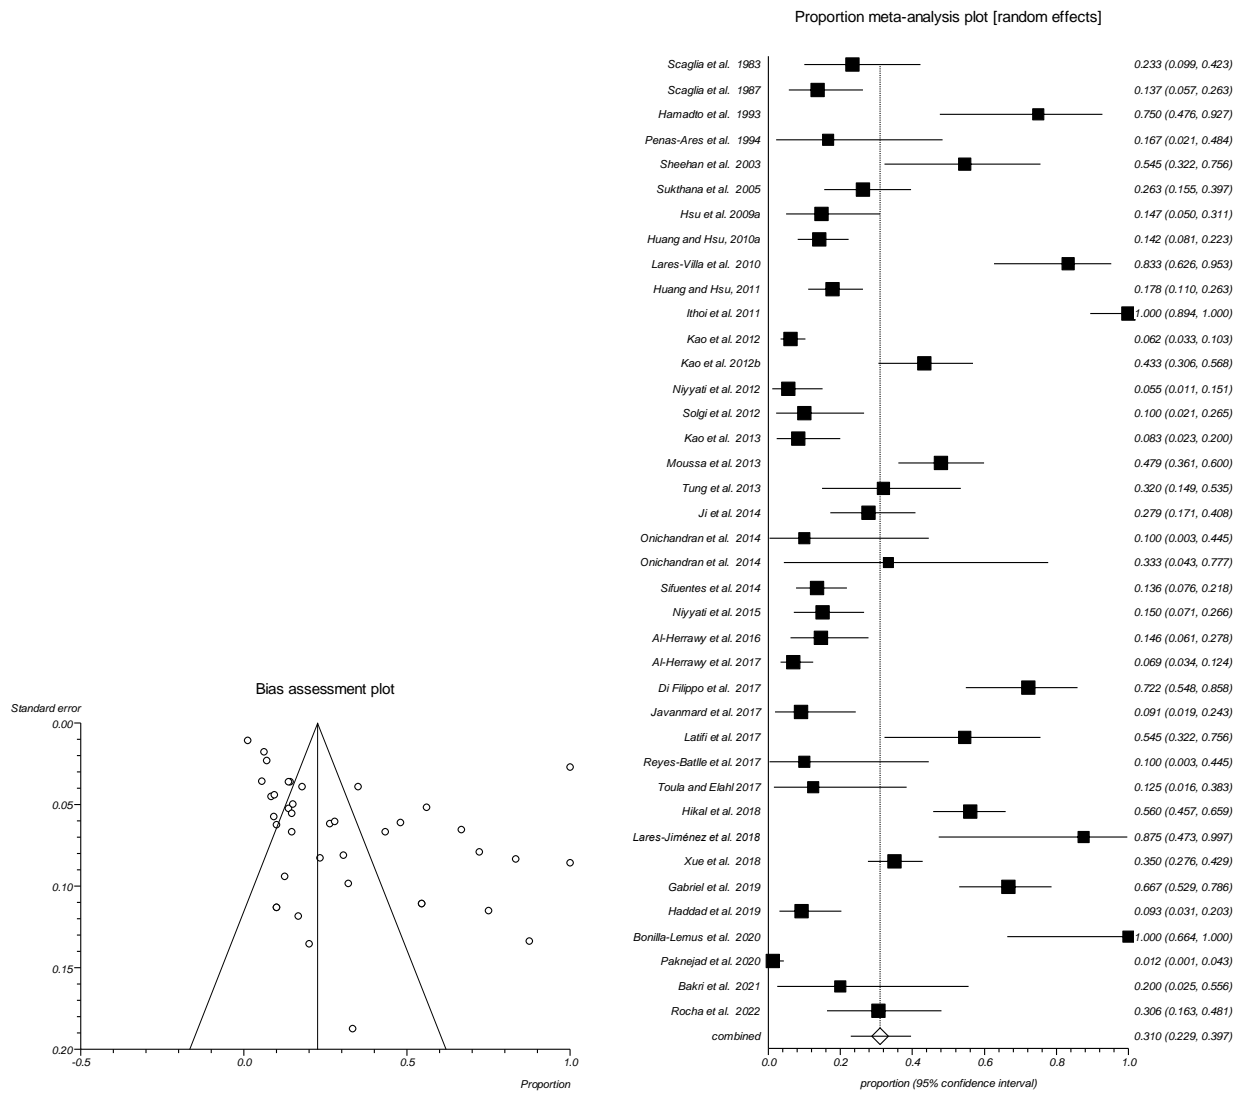

**Fig. S3** Results of Egger's regression test and the forest plot of the worldwide prevalence of *Naegleria* spp.

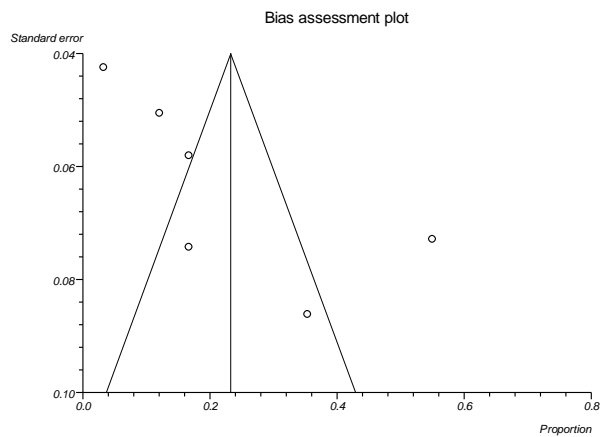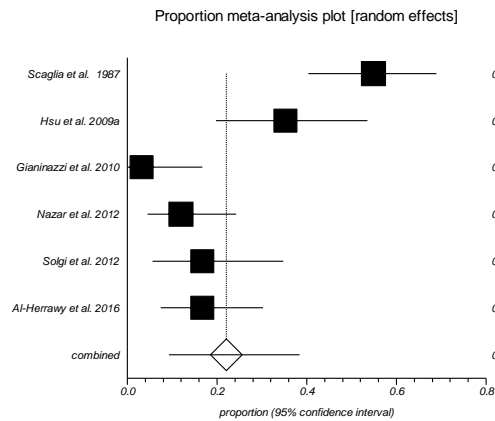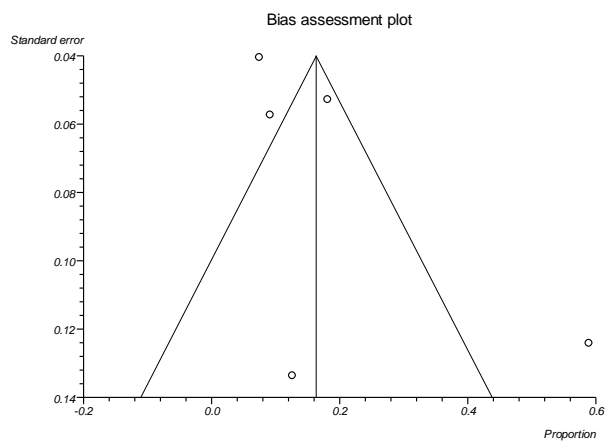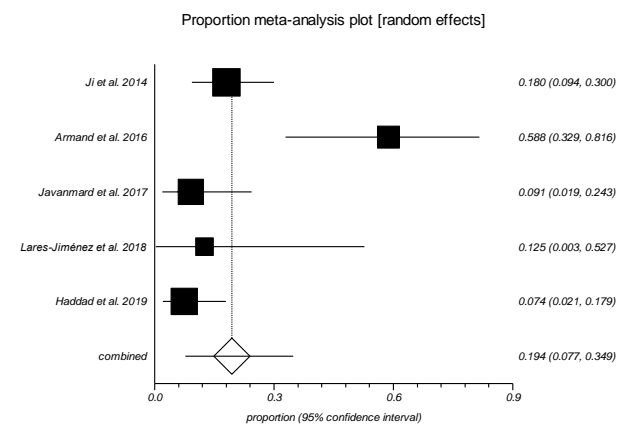

**Fig. S4** Results of Egger's regression test and the forest plot of the worldwide prevalence of *Hartmannella* spp. / *Vermamoeba* spp.

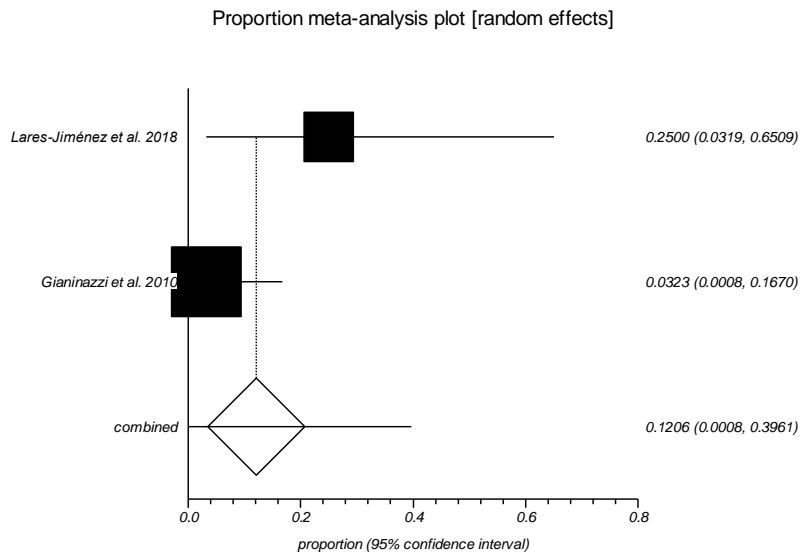

**Fig. S5** Results of Egger's regression test and the forest plot of the worldwide prevalence of *Stenamoeba* spp.

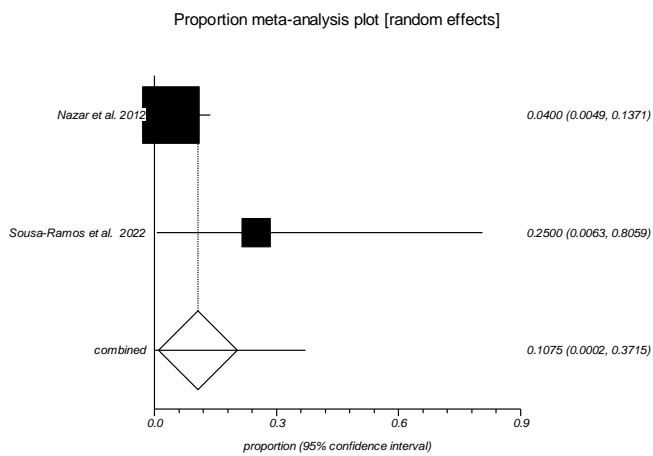

**Fig. S6** Results of Egger's regression test and the forest plot of the worldwide prevalence of *Vannella* spp.

## References

- Al-Herrawy A, Bahgat M, Mohammed AE et al (2014) *Acanthamoeba* species in Swimming Pools of Cairo, Egypt. Iranian journal of parasitology 9(2):194–201.
- Al-Herrawy AZ, Gad MA, Abd El-Aziz A et al (2016) Morphological and molecular detection of potentially pathogenic free-living amoebae in swimming pool samples, Egyptian Journal of Environmental Research 5:1-13.
- Al-Herrawy AZ, Khalil MI, El-Sherif SS et al (2017) Surveillance and Molecular Identification of *Acanthamoeba* and *Naegleria* Species in Two Swimming Pools in Alexandria University, Egypt. Iranian Journal of Parasitology 12(2):196–205.
- Alves DSMM, Moraes AS, Nitz N et al (2012) Occurrence and characterization of *Acanthamoeba* similar to genotypes T4, T5, and T2/T6 isolated from environmental sources in Brasília, Federal District, Brazil. Experimental Parasitology 131 (2):239-244. <https://doi.org/10.1016/j.exppara.2012.04.011>
- Armand B, Motazedian MH, Asgari Q (2016) Isolation and identification of pathogenic free-living amoeba from surface and tap water of Shiraz City using morphological and molecular methods. Parasitol Res. 115 (1):63-8. <https://doi.org/10.1007/s00436-015-4721-7>
- Attariani H, Turki H, Shoja S et al (2020) Investigating the frequency of free-living amoeba in water resources with emphasis on *Acanthamoeba* in Bandar Abbas city, Hormozgan province, Iran in 2019-2020. BMC research notes 13(1):420. <https://doi.org/10.1186/s13104-020-05267-z>
- Aykur M, Dagci H (2021) Evaluation of molecular characterization and phylogeny for quantification of *Acanthamoeba* and *Naegleria fowleri* in various water sources, Turkey. PloS one 16(8):e0256659. <https://doi.org/10.1371/journal.pone.0256659>
- Azlan AM, Rasid MN, Richard RL et al (2016) Titiwangsa Lake a source of urban parasitic contamination. Trop Biomed 33(3):594-598.
- Badirzadeh A, Niyayati M, Babaei Z et al (2011) Isolation of free-living amoebae from sarein hot springs in ardebil province, iran. Iranian journal of parasitology 6(2):1–8.
- Bakri R, Mohamed R, Alghanmi M, et al (2021) Isolation, Morphotyping, Molecular Characterization and Prevalence of Free-Living Amoebae from Different Water sources in Makkah city, Saudi Arabia. Journal of Umm Al-Qura University for Medical Sciences 7(2):5-8.
- Ballares LD, Masangkay FR, Dionisio J et al (2020) Molecular detection of *Acanthamoeba* spp. in Seven Crater Lakes of Laguna, Philippines. J Water Health 18(5):776-784. <https://doi.org/10.2166/wh.2020.146>
- Behniafar H, Niyayati M, Lasjerdi Z (2015) Molecular Characterization of Pathogenic *Acanthamoeba* Isolated from Drinking and Recreational water in East Azerbaijan, Northwest Iran. Environmental health insights 9:7–12. <https://doi.org/10.4137/EHI.S27811>
- Berrilli F, Di Cave D, Novelletto A, Di Filippo MM (2021) PCR-based identification of thermotolerant free-living amoebae in Italian hot springs. Eur J Protistol. 80:125812. <https://doi.org/10.1016/j.ejop.2021.125812>.
- Bonilla-Lemus P, Rojas-Hernández S, Ramírez-Flores E, et al (2020) Isolation and Identification of *Naegleria* Species in Irrigation Channels for Recreational Use in Mexicali Valley, Mexico. Pathogens 9(10):820. <https://doi.org/10.3390/pathogens9100820>
- Brown TJ, Cursons RT (1977) Pathogenic free-living amebae (PFLA) from frozen swimming areas in Oslo, Norway. Scand J Infect Dis. 9(3):237-40. <https://doi.org/10.3109/inf.1977.9.issue-3.16>
- Caumo K, Frasson AP, Pens CJ (2009) Potentially pathogenic *Acanthamoeba* in swimming pools: a survey in the southern Brazilian city of Porto Alegre. Ann Trop Med Parasitol. 103(6):477-85. <https://doi.org/10.1179/136485909X451825>
- De Jonckheere JF (1979) Pathogenic free-living amoebae in swimming pools: survey in Belgium. Ann Microbiol (Paris). 130B(2):205-12.
- Değerli S, Değerli N, Çamur D et al (2020) Genotyping by Sequencing of *Acanthamoeba* and *Naegleria* Isolates from the Thermal Pool Distributed Throughout Turkey. Acta Parasit. 65:174–186. <https://doi.org/10.2478/s11686-019-00148-3>
- Di Filippo MM, Novelletto A, Di Cave D, Berrilli F (2017) Identification and phylogenetic position of *Naegleria* spp. from geothermal springs in Italy. Exp Parasitol. 183:143-149. <https://doi.org/10.1016/j.exppara.2017.08.008>
- Dodangeh S, Kialashaki E, Daryani A et al (2018) Isolation and molecular identification of *Acanthamoeba* spp. from hot springs in Mazandaran province, northern Iran. J Water Health. 16(5):807-813. <https://doi.org/10.2166/wh.2018.098>
- Eftekhari-Kenzerki R, Solhjoo K, Babaei Z (2021) High occurrence of *Acanthamoeba* spp. in the water samples of public swimming pools from Kerman Province, Iran. J Water Health 19(5):864–871. <https://doi.org/10.2166/wh.2021.162>
- El-Badry AA, Aufy SM, El-Wakil ES et al (2020) First identification of *Naegleria* species and *Vahlkampfia ciguana* in Nile water, Cairo, Egypt: Seasonal morphology and phylogenetic analysis. J Microbiol Immunol Infect 53(2):259-265. <https://doi.org/10.1016/j.jmii.2018.06.003>

- Esboei BR, Fakhar M, Saberi R (2020) Genotyping and phylogenetic study of *Acanthamoeba* isolates from human keratitis and swimming pool water samples in Iran. *Parasite epidemiology and control* 11:e00164. <https://doi.org/10.1016/j.parepi.2020.e00164>
- Evyapan G, Koltas IS, Eroglu F (2015) Genotyping of *Acanthamoeba* T15: the environmental strain in Turkey, *Transactions of The Royal Society of Tropical Medicine and Hygiene* 109(3):221–224. <https://doi.org/10.1093/trstmh/tru179>
- Fabres LF, Dos Santos SPR, Benitez LB, Rott MB (2016) Isolation and identification of *Acanthamoeba* spp. from thermal swimming pools and spas in Southern Brazil. *Acta Parasitol.* 61(2):221-7. <https://doi.org/10.1515/ap-2016-0031>
- Gabriel S, Khan NA, Siddiqui R (2019) Occurrence of free-living amoebae (*Acanthamoeba*, *Balamuthia*, *Naegleria*) in water samples in Peninsular Malaysia. *J Water Health* 17(1):160-171. <https://doi.org/10.2166/wh.2018>
- Ghaderifar S, Najafpoor AA, Zarrinfar H et al (2018) Isolation and identification of *Acanthamoeba* from pond water of parks in a tropical and subtropical region in the Middle East, and its relation with physicochemical parameters. *BMC Microbiol* 18(1):139. <https://doi.org/10.1186/s12866-018-1301-x>
- Gianinazzi C, Schild M, Wüthrich F et al (2009) Potentially human pathogenic *Acanthamoeba* isolated from a heated indoor swimming pool in Switzerland, *Experimental Parasitology* 121(2):180-186. <https://doi.org/10.1016/j.exppara.2008.11.001>
- Gianinazzi C, Schild M, Zumkehr B et al (2010) Screening of Swiss hot spring resorts for potentially pathogenic free-living amoebae. *Exp. Parasitol.* 126(1):45-53. <https://doi.org/10.1016/j.exppara.2009.12.008>
- Gogate A, Deodhar L (1985) Isolation and identification of pathogenic *Naegleria fowleri* (aerobia) from a swimming pool in Bombay. *Trans R Soc Trop Med Hyg.* 79(1):134. [https://doi.org/10.1016/0035-9203\(85\)90258-5](https://doi.org/10.1016/0035-9203(85)90258-5)
- Górnik K, Kuźna-Grygiel W (2004) Presence of virulent strains of amphizoic amoebae in swimming pools of the city of Szczecin. *Ann Agric Environ Med.* 11(2):233-6.
- Greub G, Raoult D (2004) Microorganisms Resistant to Free-Living Amoebae. *Clin Microbiol Rev.* 17:413-33.
- Haddad MHF, Khoshnood S, Mahmoudi MR et al (2019) Molecular Identification of Free-Living Amoebae (*Naegleria* spp., *Acanthamoeba* spp. and *Vermamoeba* spp.) Isolated from Un-improved Hot Springs, Guilan Province, Northern Iran. *Iranian journal of parasitology* 14(4):584–591.
- Hamadto HH, Aufy SM, el-Hayawan IA et al (1993) Study of free living amoebae in Egypt. *J Egypt Soc Parasitol* 23(3):631-7.
- Hikal WM, Hikal W, Dkhil MA, Dkhil M (2018) Nested PCR assay for the rapid detection of *Naegleria fowleri* from swimming pools in Egypt. *Acta Ecologica Sinica* 38:102-107. <https://doi.org/10.1016/j.chnaes.2017.06.013>
- Hsu B-H, Ma P-H, Liou T-S (2009) Identification of 18S ribosomal DNA genotype of *Acanthamoeba* from hot spring recreation areas in the central range, Taiwan, *Journal of Hydrology* 367(3–4):249-254. <https://doi.org/10.1016/j.jhydrol.2009.01.018>
- Hsu BM, Lin CL, Shih FC (2009a) Survey of pathogenic free-living amoebae and *Legionella* spp. in mud spring recreation area. *Water Res.* 43(11):2817-28. <http://dx.doi.org/10.1016/j.watres.2009.04.002>
- Huang SW, Hsu BM (2010) Isolation and identification of *Acanthamoeba* from Taiwan spring recreation areas using culture enrichment combined with PCR. *Acta Trop.* 115(3):282-7. <https://doi.org/10.1016/j.actatropica.2010.04.012>
- Huang SW, Hsu BM (2010a) Survey of *Naegleria* and its resisting bacteria-*Legionella* in hot spring water of Taiwan using molecular method. *Parasitol Res.* 106:1395–1402. <https://doi.org/10.1007/s00436-010-1815-0>
- Huang SW, Hsu BM (2011) Survey of *Naegleria* from Taiwan recreational waters using culture enrichment combined with PCR. *Acta Trop.* 119(2-3):114-8. <https://doi.org/10.1016/j.actatropica.2011.04.016>
- Hussain RHM, Ishak AR, Ghani MKA et al (2019) Occurrence and molecular characterisation of *Acanthamoeba* isolated from recreational hot springs in Malaysia: evidence of pathogenic potential. *J Water Health* 17(5):813–825. <https://doi.org/10.2166/wh.2019.214>
- Init I, Lau YL, Fadzlan AA, Foad AI (2010) Detection of free living amoebae, *Acanthamoeba* and *Naegleria*, in swimming pools, Malaysia. *Trop Biomed.* 27(3):566-77.
- Ithoi I, Ahmad AF, Nissapatorn V et al (2011) Detection of *Naegleria* species in environmental samples from Peninsular Malaysia. *PloS one*, 6 (9), e24327. <https://doi.org/10.1371/journal.pone.0024327>
- Izumiyama S, Yagita K, Furushima-Shimogawara R et al (2003) Occurrence and distribution of *Naegleria* species in thermal waters in Japan. *J Eukaryot Microbiol* 50 Suppl:514-5. <https://doi.org/10.1111/j.1550-7408.2003.tb00614.x>
- Janitschke K, Werner H, Müller G (1980) Das Vorkommen von freilebenden Amöben mit möglichen pathogenen Eigenschaften in Schwimmbädern [Examinations on the occurrence of free-living amoebae with possible pathogenic traits in swimming pools (author's transl)]. *Zentralbl Bakteriol B.* 170(1-2):108-22.
- Javanmard E, Niyayati M, Lorenzo-Morales J et al (2017) Molecular identification of waterborne free living amoebae (*Acanthamoeba*, *Naegleria* and *Vermamoeba*) isolated from municipal drinking water and environmental sources, Semnan province, north half of Iran. *Exp Parasitol.* 183:240-244. <https://doi.org/10.1016/j.exppara.2017.09.016>

- Ji WT, Hsu BM, Chang TY et al (2014) Surveillance and evaluation of the infection risk of free-living amoebae and *Legionella* in different aquatic environments. *Science of The Total Environment* 499:212–219. <https://doi.org/10.1016/j.scitotenv.2014.07.116>
- Johnson RO, Cope JR, Moskowicz M et al MJ (2016) Notes from the Field: Primary Amebic Meningoencephalitis Associated with Exposure to Swimming Pool Water Supplied by an Overland Pipe - Inyo County, California, 2015. *MMWR Morb Mortal Wkly Rep.* 65(16):424. <https://doi.org/10.15585/mmwr.mm6516a4>
- Kang H, Sohn HJ, Seo GE et al (2020) Molecular detection of free-living amoebae from Namhangang (southern Han River) in Korea. *Sci Rep.* 10(1):335. <https://doi.org/10.1038/s41598-019-57347-1>
- Kao PM, Hsu BM, Chen NH et al (2012a) Isolation and identification of *Acanthamoeba* species from thermal spring environments in southern Taiwan. *Experimental Parasitology* 130(4):354–358. <https://doi.org/10.1016/j.exppara.2012.02.008>
- Kao P-M, Hsu B-M, Chiu Y-C et al (2012). Identification of the *Naegleria* Species in Natural Watersheds Used for Drinking and Recreational Purposes in Taiwan, *Journal of Environmental Engineering* 138(8):893-898. [https://doi.org/10.1061/\(ASCE\)EE.1943-7870.0000549](https://doi.org/10.1061/(ASCE)EE.1943-7870.0000549)
- Kao PM, Tung MC, Hsu BM et al (2012b) Occurrence and distribution of *Naegleria* species from thermal spring environments in Taiwan. *Letters in Applied Microbiology* 56(1):1–7. <https://doi.org/10.1111/lam.12006>
- Kao PM, Tung MC, Hsu BM et al (2013) Quantitative detection and identification of *Naegleria* spp. in various environmental water samples using real-time quantitative PCR assay. *Parasitol Res.* 112(4):1467-74. <https://doi.org/10.1007/s00436-013-3290-x>
- Kao PM, Tung MC, Hsu BM et al (2013a) Real-time PCR method for the detection and quantification of *Acanthamoeba* species in various types of water samples. *Parasitol Res* 112(3):1131-6. <https://doi.org/10.1007/s00436-012-3242-x>
- Kiss C, Barna Z, Vargha M, Török JK (2014) Incidence and molecular diversity of *Acanthamoeba* species isolated from public baths in Hungary. *Parasitol Res* 113:2551–2557. <https://doi.org/10.1007/s00436-014-3905-x>
- Lares-Jiménez LF, Borquez-Román MA, Lares-García C et al (2018) Potentially pathogenic genera of free-living amoebae coexisting in a thermal spring. *Experimental Parasitology* 195:54-58. <https://doi.org/10.1016/j.exppara.2018.10.006>
- Lares-Villa F, Hernández-Peña C (2010) Concentration of *Naegleria fowleri* in natural waters used for recreational purposes in Sonora, Mexico (November 2007-October 2008). *Exp Parasitol* 126(1):33-6. <https://doi.org/10.1016/j.exppara.2010.04.011>
- Latiff NSA, Jali A, Azmi NA et al (2018) A ocorrência de *Acanthamoeba* e *Naegleria* em águas recreativas de fontes termais selecionadas em Selangor, Malásia. *International Journal of Tropical Medicine* 13(3):21–24.
- Latifi A, Salami M, Kazemirad E, Soleimani M (2020) Isolation and identification of free-living amoeba from the hot springs and beaches of the Caspian Sea. *Parasite epidemiology and control* 10:e00151. <https://doi.org/10.1016/j.parepi.2020.e00151>
- Latifi AR, Niyiyati M, Lorenzo-Morales J et al (2016) Presence of *Balamuthia mandrillaris* in hot springs from Mazandaran province, northern Iran. *Epidemiol Infect.* 144(11):2456-61. <https://doi.org/10.1017/S095026881600073X>
- Latifi AR, Niyiyati M, Lorenzo-Morales J et al (2017) Occurrence of *Naegleria* species in therapeutic geothermal water sources, Northern Iran. *Acta Parasitol.* 62(1):104-109. <https://doi.org/10.1515/ap-2017-0012>
- Lekkla A, Sutthikornchai C, Bovornkitti S, Sukthana Y (2005) Free-living ameba contamination in natural hot springs in Thailand. *Southeast Asian J Trop Med Public Health.* 36(4):5-9.
- Lyons TB, Kapur R (1977) *Limax* amoebae in public swimming pools of albany, schenectady, and rensselaer counties, new york: their concentration, correlations, and significance. *Applied and Environmental Microbiology* 33(3):551–555. <https://doi.org/10.1128/aem.33.3.551-555.1977>
- Mafi M, Niyiyati M, Haghighi A, Lasjerdi Z (2017) Contamination of Swimming Pools and Park Ponds with Free Living Amoebae in Tehran. *Med J Tabriz Uni Med Sciences Health Services* 38(6):2783-2031. <https://mj.tbzmed.ac.ir/Article/15215>
- Maghsoodloorad S, Maghsoodloorad E, Tavakoli Kareshk A et al (2019) Thermotolerant *Acanthamoeba* spp. isolated from recreational water in Gorgan City, north of Iran. *J Parasit Dis* 43(2):240-245. <https://doi.org/10.1007/s12639-018-01081-4>
- Moussa M, De Jonckheere JF, Guerlotté J et al (2013) Survey of *Naegleria fowleri* in geothermal recreational waters of Guadeloupe (French West Indies). *PloS one* 8(1):e54414. <https://doi.org/10.1371/journal.pone.0054414>
- Munoz V, Reyes H, Toche P et al (2003) Isolation of free living amoebae from public swimming pool in Santiago, Chile. *Parasitologia Latinoamericana* 58(3/4):106-111. <https://eurekamag.com/research/004/215/004215933.php>
- Nageeb MM, Eldeek HEM, Attia RAH et al (2022) Isolation and morphological and molecular characterization of waterborne free-living amoebae: Evidence of potentially pathogenic *Acanthamoeba* and Vahlkampfiidae in Assiut, Upper Egypt. *PLoS One* 17(7):e0267591. <https://doi.org/10.1371/journal.pone.0267591>
- Nazar M, Haghighi A, Niyiyati M et al (2011) Genotyping of *Acanthamoeba* isolated from water in recreational areas of Tehran, Iran. *J Water Health* 9(3):603-8. <https://doi.org/10.2166/wh.2011.152>



- Nazar M, Haghghi A, Taghipour N et al (2012) Molecular identification of *Hartmannella vermiformis* and *Vannella persistens* from man-made recreational water environments, Tehran, Iran. *Parasitol Res.* 111:835–839. <https://doi.org/10.1007/s00436-012-2906-x>
- Nisar MA, Ross KE, Brown MH et al (2020) *Legionella pneumophila* and Protozoan Hosts: Implications for the Control of Hospital and Potable Water Systems. *Pathogens* 9(4):286. <https://doi.org/10.3390/pathogens9040286>
- Niyyati M, Lasjerdi Z, Nazar M et al (2012) Screening of recreational areas of rivers for potentially pathogenic free-living amoebae in the suburbs of Tehran, Iran. *J Water Health* 10(1):140–146. <https://doi.org/10.2166/wh.2011.068>
- Niyyati M, Lasjerdi Z, Zarein-Dolab S et al (2015) Morphological and Molecular Survey of *Naegleria* spp. in Water Bodies Used for Recreational Purposes in Rasht city, Northern Iran. *Iranian Journal of Parasitology* 10(4):523–529.
- Niyyati M, Nazar M, Lasjerdi Z (2015a) Reporting of T4 Genotype of *Acanthamoeba* Isolates in Recreational Water Sources of Gilan Province, Northern Iran. *Novel Biomed.* 3(1):20–4. <https://doi.org/10.22037/nbm.v3i1.7177>
- Niyyati M, Saberi R, Latifi A, Lasjerdi Z (2016) Distribution of *Acanthamoeba* Genotypes Isolated from Recreational and Therapeutic Geothermal Water Sources in Southwestern Iran. *Environmental health insights* 10:69–74. <https://doi.org/10.4137/EHI.S38349>
- Niyyati M, Saberi R, Lorenzo-Morales J, Salehi R (2016a) High occurrence of potentially-pathogenic free-living amoebae in tap water and recreational water sources in South-West Iran. *Trop Biomed.* 33(1):95–101.
- Onichandran S, Kumar T, Salibay CC (2014) Waterborne parasites: a current status from the Philippines. *Parasit Vectors* 7:244. <https://doi.org/10.1186/1756-3305-7-244>
- Paknejad N, Hajjalilo E, Saraei M, Javadi A (2020) Isolation and identification of *Acanthamoeba* genotypes and *Naegleria* spp. from the water samples of public swimming pools in Qazvin, Iran. *J Water Health.* 18(2):244–251. <https://doi.org/10.2166/wh.2019.074>
- Penas-Ares M, Paniagua-Crespo E, Madriñan-Choren R et al (1994) Isolation of free-living pathogenic amoebae from thermal spas in N.W. Spain. *Water Air Soil Pollut* 78:83–90. <https://doi.org/10.1007/BF00475670>
- Pernin P, Riány A (1978) Etude sur la présence d'amibes libres' dans les eaux des piscines lyonnaises [Study on the presence of "free-living" amoebae in the swimming-pools of Lyon (author's transl)]. *Ann Parasitol Hum Comp.* 53(4):333–44. French. PMID: 727637.
- Poor BM, Dalimi A, Ghafarifar F et al (2018) Contamination of swimming pools and hot tubs biofilms with *Acanthamoeba*. *Acta Parasit.* 63:147–153. <https://doi.org/10.1515/ap-2018-0016>
- Rahdar M, Niyyati M, Salehi M et al (2012) Isolation and genotyping of *Acanthamoeba* strains from environmental sources in ahvaz city, khuzestan province, southern iran. *Iran J Parasitol* 7(4):22–6.
- Reyes-Battle M, Gabriel MF, Rodríguez-Expósito R et al (2021) Evaluation of the occurrence of pathogenic free-living amoeba and bacteria in 20 public indoor swimming pool facilities. *MicrobiologyOpen* 10(1):e1159. <https://doi.org/10.1002/mbo3.1159>
- Reyes-Battle M, Wagner C, López-Arencibia A et al (2017) Isolation and molecular characterization of a *Naegleria* strain from a recreational water fountain in Tenerife, Canary Islands, Spain. *Acta Parasitol.* 62(2):265–268. <https://doi.org/10.1515/ap-2017-0033>
- Rezaeian M, Niyyati M, Farnia Sh, Haghi AM (2008) Isolation of *Acanthamoeba* Spp. from Different Environmental Sources. *Iranian J Parasitol* 3(1):44–47.
- Rocha MJ, Sousa KK, Carneiro JLS, Weber DM, (2022) Isolation of potentially pathogenic free-living amoebae in swimming pools for collective use located in the municipality of Redenção, Pará, Brazil. *Rev Ciênc Med* 31:e225222. <https://doi.org/10.24220/2318-0897v31e2022a5222>
- Salehi M, Niazkar HR, Nasirzadeh A (2019) Isolation and genotyping of *Acanthamoeba* strains from water sources of Kermanshah, Iran. *Ann Parasitol* 65(4):397–402. <https://doi.org/10.17420/ap6504.226>
- Salehi M, Spotin A, Hajizadeh F et al (2022) Molecular characterization of *Acanthamoeba* spp. from different sources in Gonabad, Razavi Khorasan, Iran. *Gene Reports* 27:101573. <https://doi.org/10.1016/j.genrep.2022.101573>
- Sarmadian H, Hazbavi Y, Didehdar M et al (2020) Fungal and parasitic contamination of indoor public swimming pools in Arak, Iran. *The Journal of the Egyptian Public Health Association* 95(1):8. <https://doi.org/10.1186/s42506-020-0036-3>
- Scaglia M, Gatti S, Brustia R et al (1987) Pathogenic and non-pathogenic *Naegleria* and *Acanthamoeba* spp.: a new autochthonous isolate from an Italian thermal area. *Microbiologica* 10(2):171–82.
- Scaglia M, Strosselli M, Grazioli V et al (1983) Isolation and identification of pathogenic *Naegleria australiensis* (Amoebida, *Vahlkampfiidae*) from a spa in northern Italy. *Appl Environ Microbiol* 46(6):1282–5. <https://doi.org/10.1128/aem.46.6.1282-1285.1983>
- Sheehan KB, Fagg JA, Ferris MJ et al (2003) PCR detection and analysis of the free-living amoeba *Naegleria* in hot springs in Yellowstone and Grand Teton National Parks. *Appl Environ Microbiol* 69(10):5914–8. <https://doi.org/10.1128/AEM.69.10.5914-5918.2003>

- Sifuentes LY, Choate BL, Gerba CP et al (2014) The occurrence of *Naegleria fowleri* in recreational waters in Arizona. J Environ Sci Health A Tox Hazard Subst Environ Eng. 49(11):1322-30. <https://doi.org/10.1080/10934529.2014.910342>
- Solgi R, Niyayati M, Haghighi A et al (2012a) Thermotolerant *Acanthamoeba* spp. isolated from therapeutic hot springs in Northwestern Iran. J Water Health 10(4):650-6. <https://doi.org/10.2166/wh.2012.032>
- Solgi R, Niyayati M, Haghighi A, Mojarad EN (2012) Occurrence of Thermotolerant *Hartmannella vermiformis* and *Naegleria* Spp. in Hot Springs of Ardebil Province, Northwest Iran. Iranian journal of parasitology 7(2):47-52.
- Sousa-Ramos D, Reyes-Batlle M, Bellini NK et al (2022) Pathogenic free-living amoebae from water sources in Cape Verde. Parasitol Res. 121(8):2399-2404. <https://doi.org/10.1007/s00436-022-07563-y>
- Sukthana Y, Lekkla A, Sutthikornchai C et al (2005) Spa, springs and safety. Southeast Asian J Trop Med Public Health 36 Suppl 4:10-6.
- Todd CD, Reyes-Batlle M, Piñero JE et al (2015) Isolation and molecular characterization of *Acanthamoeba* genotypes in recreational and domestic water sources from Jamaica, West Indies. J Water Health 13(3):909-19. <https://doi.org/10.2166/wh.2015.232>
- Toula FH, Elahl SAS (2017) Isolation and identification of free living amoebae from water sources with respect to *Acanthamoeba*, *Naegleria* in Jeddah City, Saudi Arabia. Int. J. Pharm. Res. Allied Sci. 6(2):01-08.
- Tsvetkova N, Schild M, Panaiotov S et al (2004) The identification of free-living environmental isolates of amoebae from Bulgaria. Parasitol Res. 92(5):405-13. <https://doi.org/10.1007/s00436-003-1052-x>
- Tung MC, Hsu BM, Tao CW et al (2013) Identification and significance of *Naegleria fowleri* isolated from the hot spring which related to the first primary amebic meningoencephalitis (PAM) patient in Taiwan. International Journal for Parasitology 43(9):691-696. <https://doi.org/10.1016/j.ijpara.2013.01.012>
- Vesaluoma M, Kalso S, Jokipii L et al (1995) Microbiological quality in Finnish public swimming pools and whirlpools with special reference to free living amoebae: a risk factor for contact lens wearers?. The British journal of ophthalmology 79(2):178-181. <https://doi.org/10.1136/bjo.79.2.178>
- Vijayakumar R (2018) Isolation, identification of pathogenic *Acanthamoeba* from drinking and recreational water sources in Saudi Arabia. Journal of advanced veterinary and animal research 5(4):439-444. <https://doi.org/10.5455/javar.2018.e296>
- Xue J, Lamar FG, Zhang B (2018) Quantitative assessment of *Naegleria fowleri* and fecal indicator bacteria in brackish water of Lake Pontchartrain, Louisiana. Sci Total Environ. 622-623:8-16. <https://doi.org/10.1016/j.scitotenv.2017.11.308>
- Zeybek Z, Türkmen A (2020) Investigation of the Incidence of *Legionella* and Free-Living Amoebae in Swimming Pool Waters and Biofilm Specimens in Istanbul by Different Methods. Mikrobiyol Bul. 54(1):50-65. <https://doi.org/10.5578/mb.68962>
